# Supplementary material for: Dynamic docking assisted engineering of hydrolase for efficient PET depolymerization
Source: Research Square preprint supplement (doi:10.21203/rs.3.rs-2349308/v1), 2023-06-28
Supplement: Supplementary file 1 [file af479f2ebae604046b577f9f.docx]

# Supplementary Information

# Dynamic docking assisted engineering of hydrolase for efficient PET depolymerization

Yi Zheng#, Qingbin Li#, Pan Liu, Yingbo Yuan, Longyang Dian, Qian Wang, Quanfeng Liang, Tianyuan Su*, Qingsheng Qi*

State Key Laboratory of Microbial Technology, Shandong University, Qingdao, 266237, People’s Republic of China

### # These authors contributed equally to this work.

*** Correspondence：**

Qingsheng Qi

Email: qiqingsheng@sdu.edu.cn

Tel: +86-532-58632580

Tianyuan Su

Email: sutianyuan@sdu.edu.cn

Tel: +86-532-58632580

## Supplementary Figures


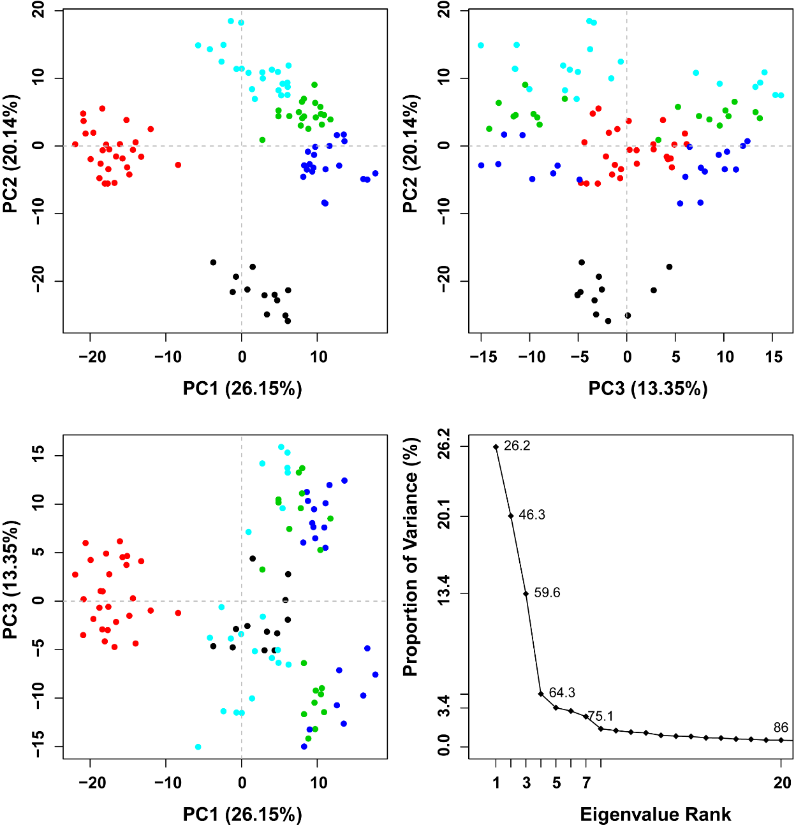


**Supplementary Figure 1.** **Principal component analysis and clustering analysis on the trajectory of MD simulations.** Projection of the distribution onto the subspace defined by the largest principal components results in a lower dimensional representation of the structural dataset. And the four dimensions capture 64.3% of the total variance of the molecular dynamic simulation trajectory. The k-means clustering method was used to cluster the trajectories and co-cluster into 5 classes.


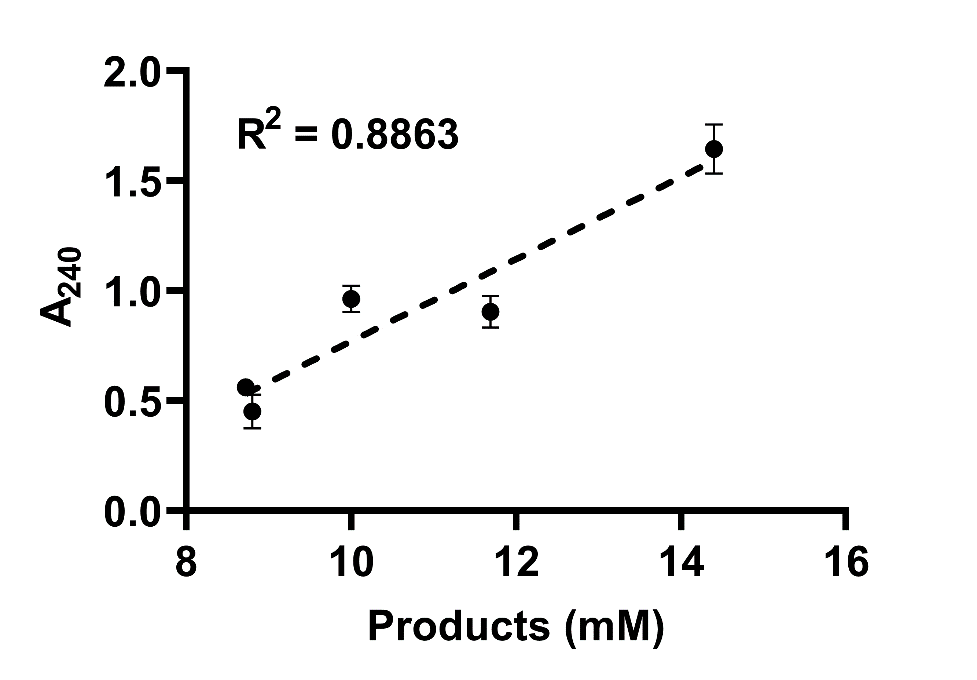


**Supplementary Figure 2. Correlation analysis of the PET hydrolysis product concentration with the absorbance at 240 nm.** The concentrations of the benzene-containing components in five PET hydrolysis products were determined separately using HPLC, and they were linearly correlated with the absorbance at 240 nm (A240). All experiments were conducted in triplicate (*n* = 3).


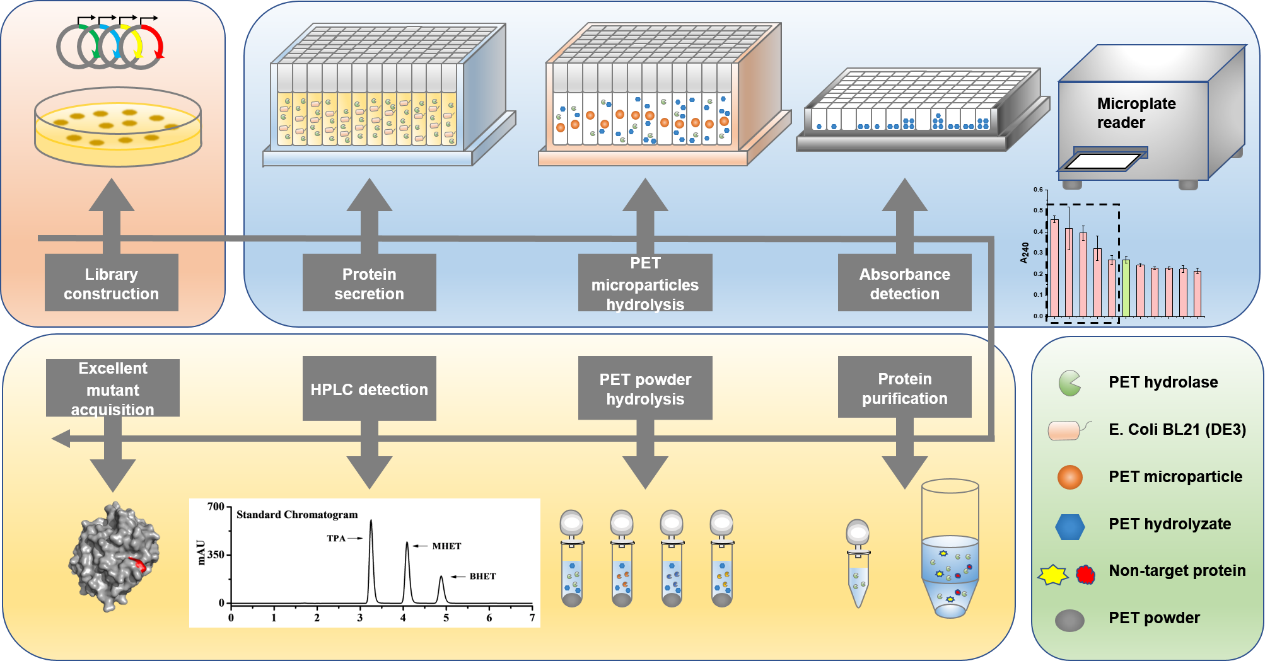


**Supplementary Figure 3. Workflow for high-throughput screening of PET hydrolase.** The workflow consists of three parts. The first part is the construction of the variant library. The second part is the hydrolysis of PET microparticles by the crude enzyme and rapid assessment of the relative PET-degrading activity of the variants by the absorbance at 240 nm. The third part is the purification of the variant with high A240 and accurate detection of its PET degradation product by HPLC. The variant with the highest activity was selected as the starting enzyme for the next round of engineering.


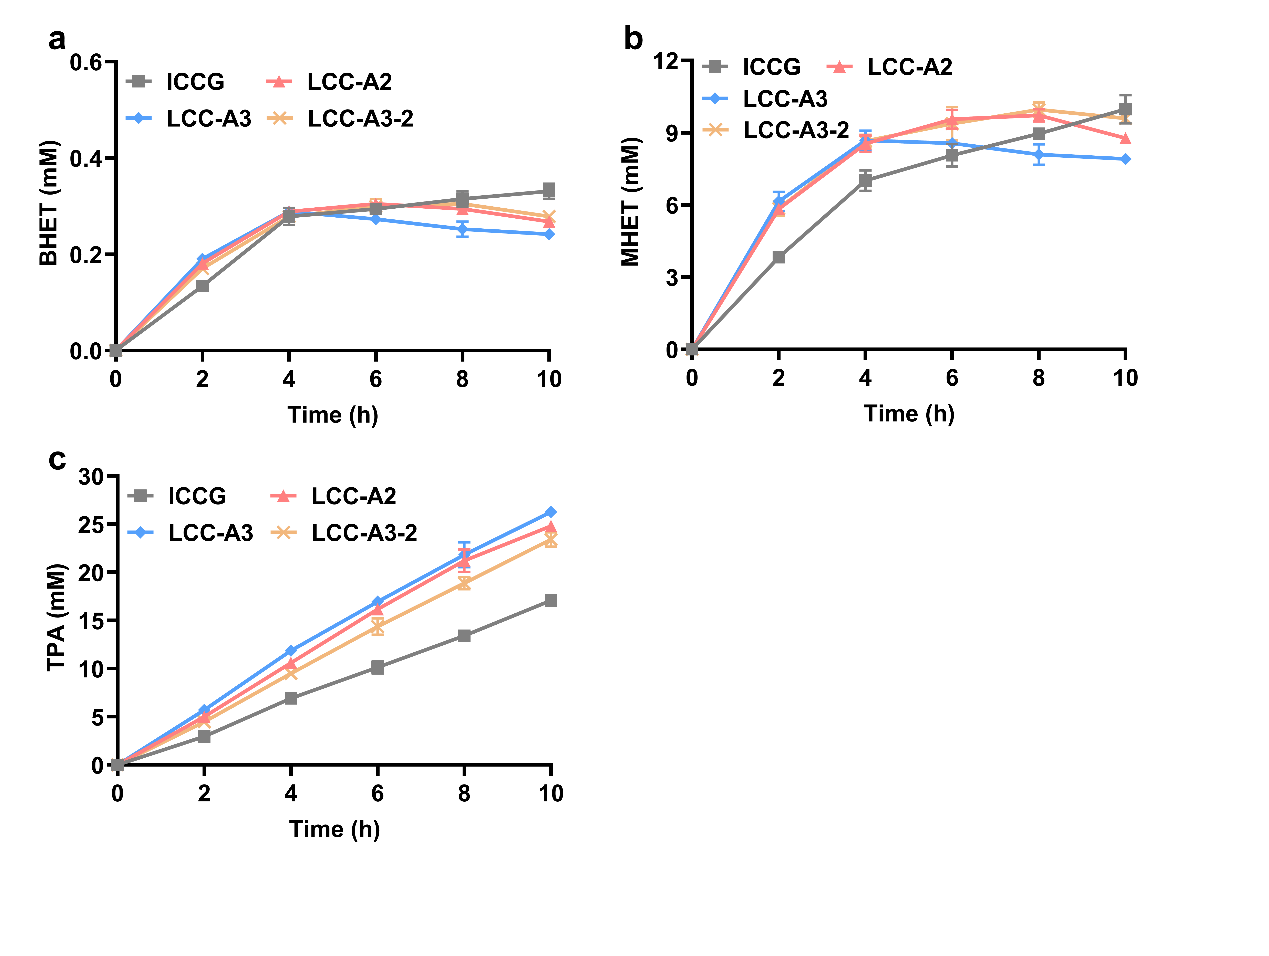


**Supplementary Figure 4. Time course of product accumulation during the depolymerization of amorphous PET powder.** Time-course products release with ICCG, LCC-A2, LCC-A3 and LCC-A3-2 at the reaction temperature of 72 °C, using 1% amorphous PET powder (10 g l−1) and 5 mgenzyme gPET−1 in 0.1 M phosphate buffer (pH 8.0). **a**, BHET. **b**, MHET. **C**, TPA. All experiments were conducted in triplicate (*n* = 3).


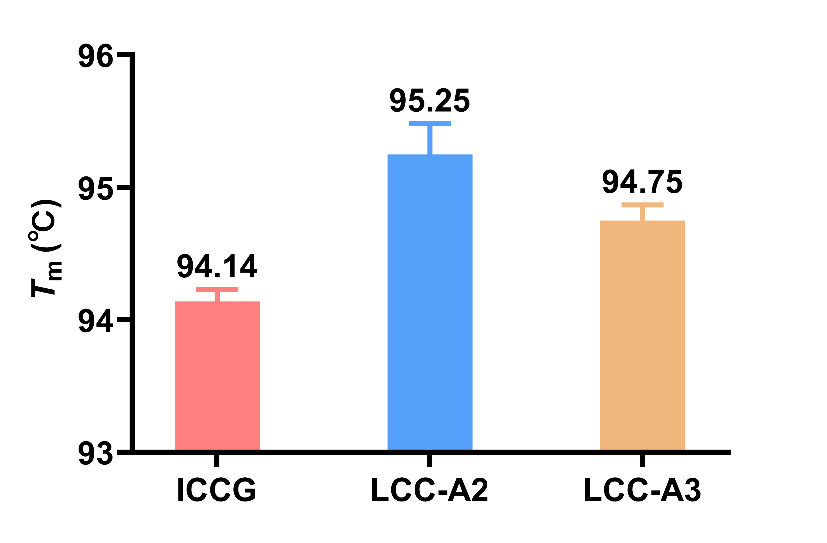


**Supplementary Figure 5. The melting temperature for LCC variants.** The melting temperature (*T*m) of ICCG, LCC-A2 and LCC-A3 was measured by differential scanning fluorimetry (DSF). All experiments were conducted in quadruplicate (*n* = 4).


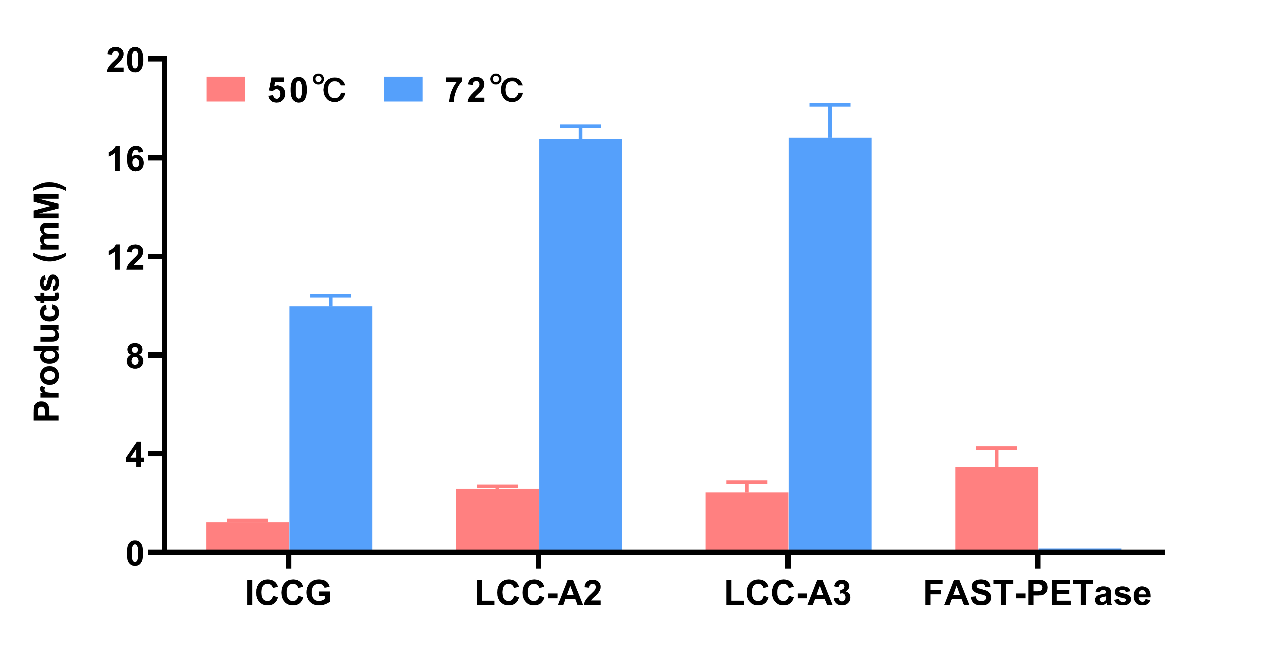


**Supplementary Figure 6. Activity comparison between LCC variants and Fast-PETase.** The degradation products of LCC variants and Fast-PETase for the amorphous PET powder at reaction temperatures of 50 °C and 72 °C for 2 h. The products were the sum of BHET, MHET and TPA detected by HPLC. All experiments were conducted in triplicate (*n* = 3).


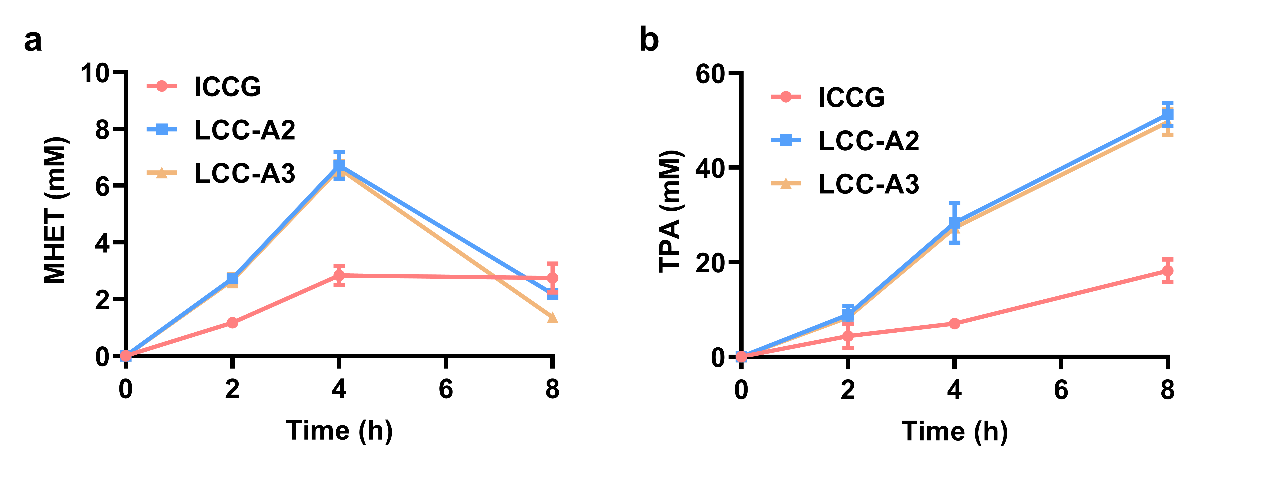


**Supplementary Figure 7. Time course of product accumulation during the depolymerization of amorphous PET film.** Comparison of the PET-degrading activity of ICCG, LCC-A2 and LCC-A3 towards the amorphous PET films in 1 M phosphate buffer (pH 8.5) at 78 °C, as measured the product concentration by HPLC. 45 mg of PET film was used for each reaction with 0.6 mgenzyme gPET−1. **a**, MHET. **b**, TPA. All experiments were conducted in triplicate (*n* = 3).

###


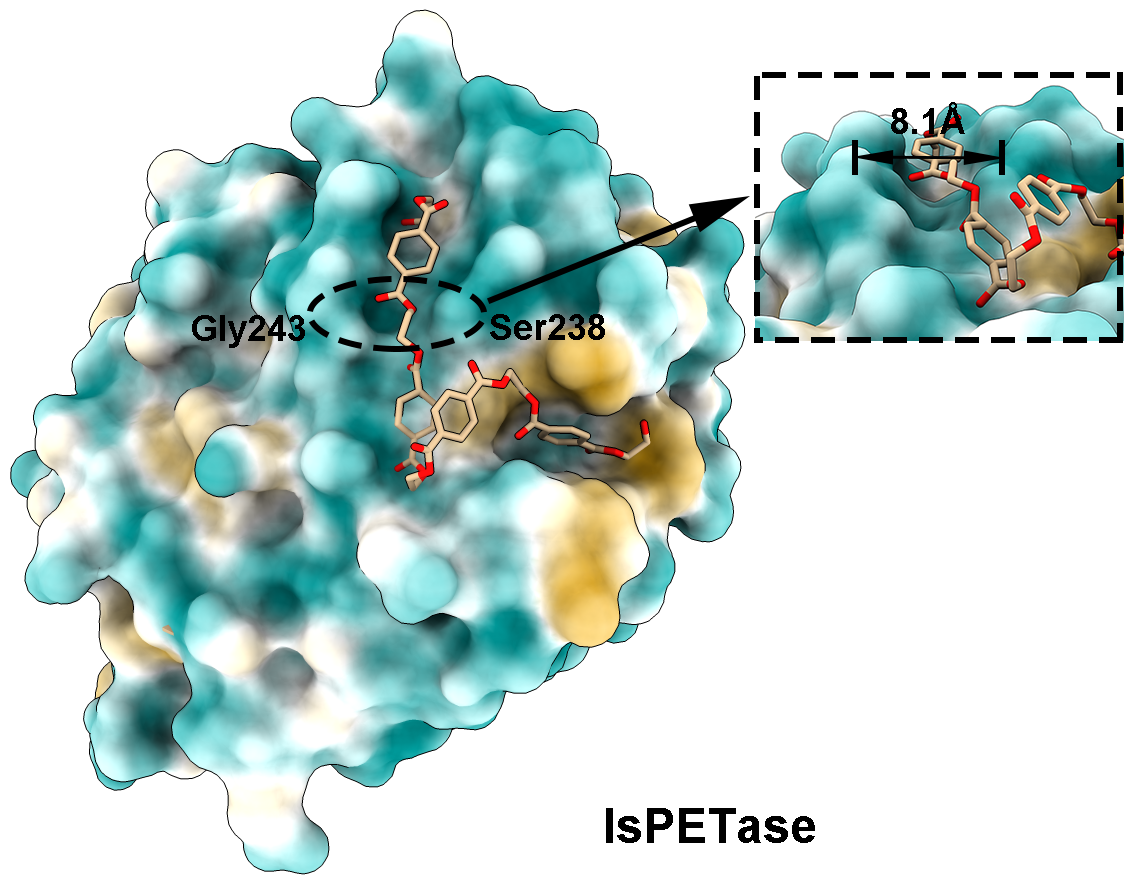


**Supplementary Figure 8. Structural features of the *Is*PETase.** Molecular docking of *Is*PETase (PDB: 5XJH) with 4PET. The channel formed by S238 and G243 affect the binding of PET chains.


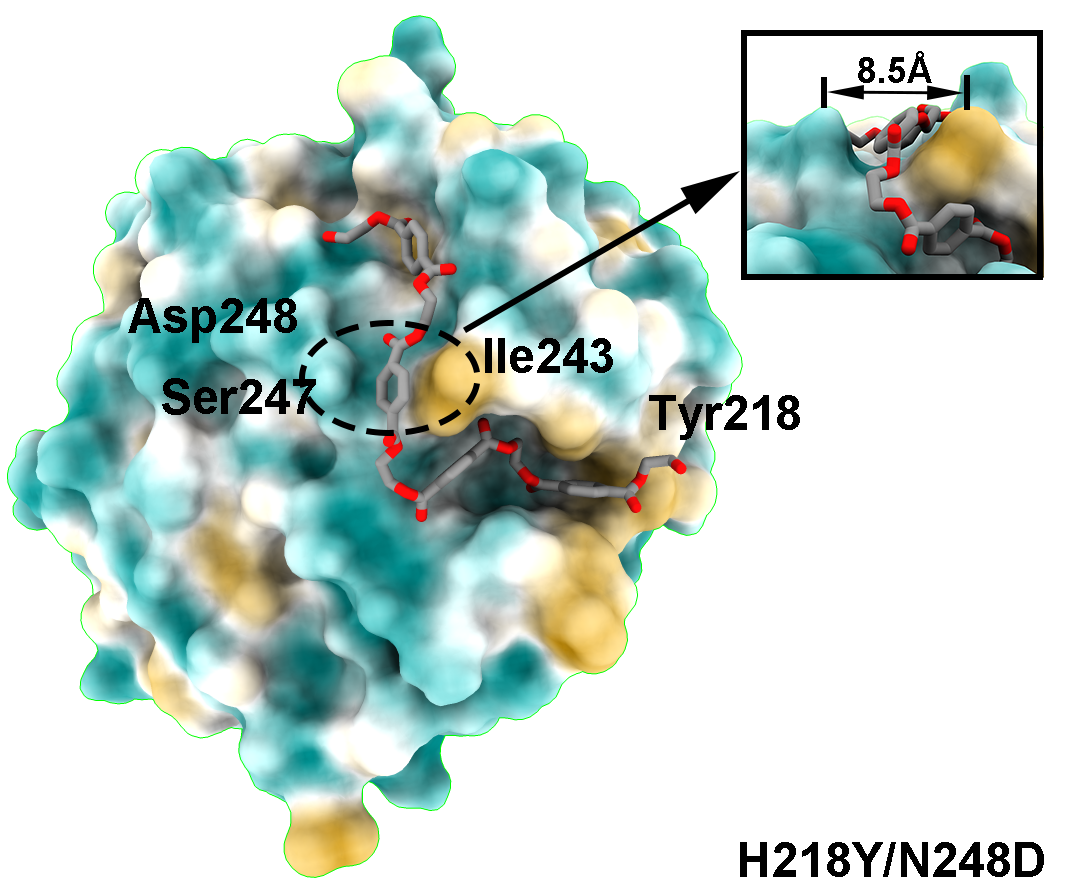


**Supplementary Figure 9. Structural features of the LCC variant LCC-A2.** Molecular docking of LCC-A2 (ICCGH218Y/N248D) with 4PET. Compared to the 5.9Å channel diameter between S247 and I243 in ICCG, after mutation, the channel diameter reached 8.5Å.


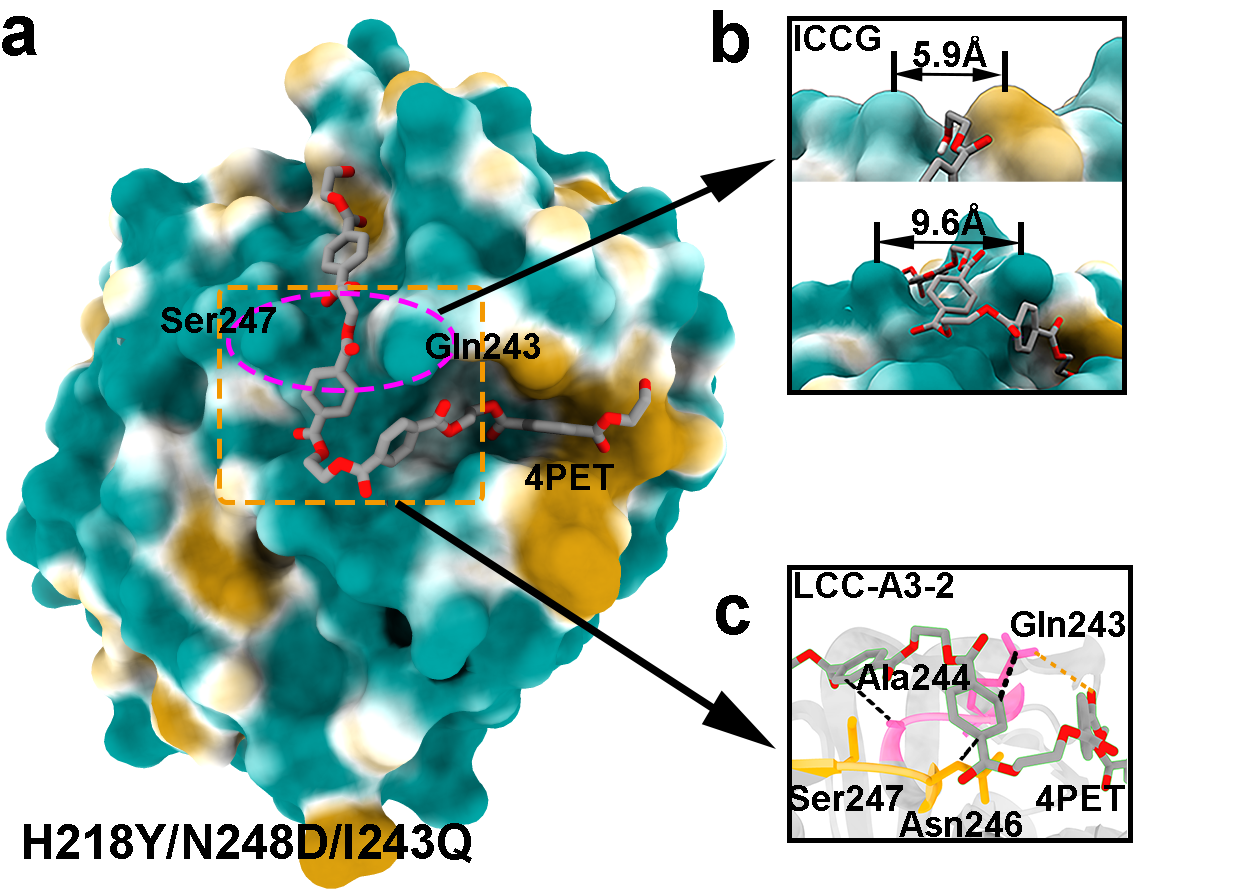


**Supplementary Figure 10. Structural features of the LCC variant LCC-A3-2. a**, Structural features of LCC-A3-2 (ICCGH218Y/N248D/I243Q). 4PET could cross the channel and dock to the PET binding region 2 in LCC-A3-2. **b**, the I243Q mutation in LCC-A3-2 led to an increase in the channel width between the two PET binding regions from 5.9 Å to 9.6 Å. **c**, the I243Q mutation introduced three hydrophobic interactions between Q243, A244, N246 and 4PET, and a hydrogen bond between Q243 and 4PET. The hydrophobic interactions between 4PET and amino acid residues are marked with black dashed lines, and the hydrogen bonds between 4PET and amino acid residues are marked with orange dashed lines.


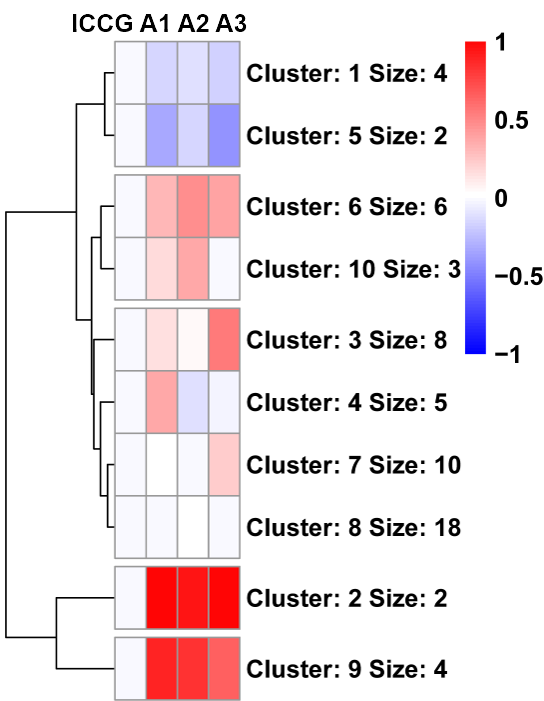


**Supplementary Figure 11. The change in the PET binding capacity of key amino acids in the PET binding region.** White represents that the binding capacity of the variant's amino acid residues with PET is similar to that of ICCG, blue represents the variant's amino acid residues have a reduced binding capacity with PET, and red represents that the variant's amino acid residues have an increased binding capacity with PET, and the darker the color, the greater the change.


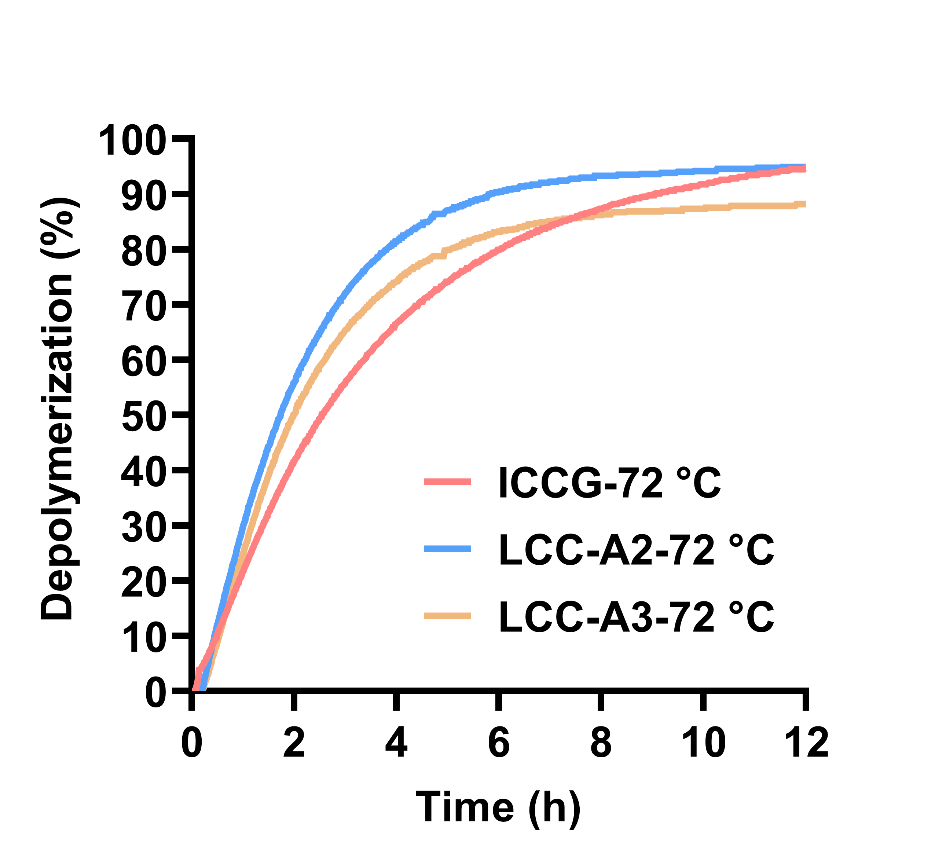


**Supplementary Figure 12. Bio-depolymerization of post-consumer PET bottles by ICCG, LCC-A2 and LCC-A3 at 72 °C.** Comparison of the Pc-PET depolymerization kinetics of ICCG, LCC-A2 and LCC-A3 using 200 g kg−1 pretreated Pc-PET and 0.6 g kg−1 enzyme. The degradation process was carried out in 0.1 M phosphate buffer (pH 8.5) at 72 °C. The pH was maintained by titrating aqueous NaOH to neutralize the acidic product TPA produced by the Pc-PET degradation. The percentage of Pc-PET depolymerization was calculated based on the consumption of NaOH.


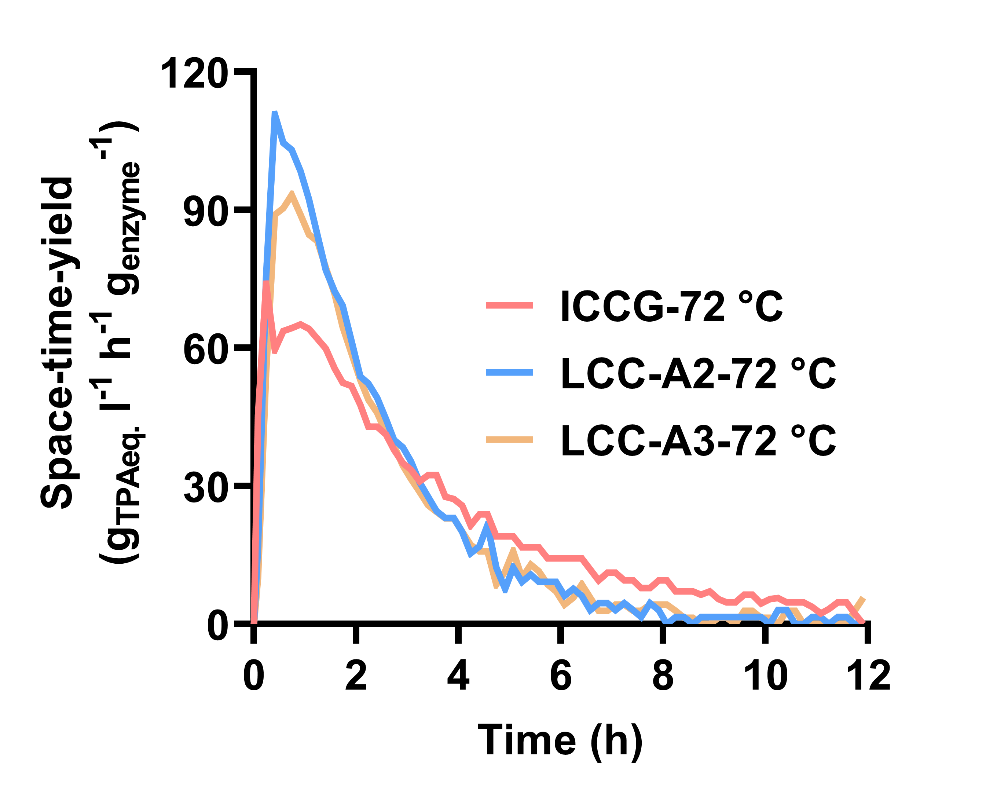


**Supplementary Figure 13. The specific space-time-yield product of ICCG, LCC-A2 and LCC-A3 in 72 °C.** Comparison of the specific space-time-yield product from ICCG, LCC-A2 and LCC-A3. The equivalent TPA quantity (TPAeq.) was converted from the consumption of NaOH.


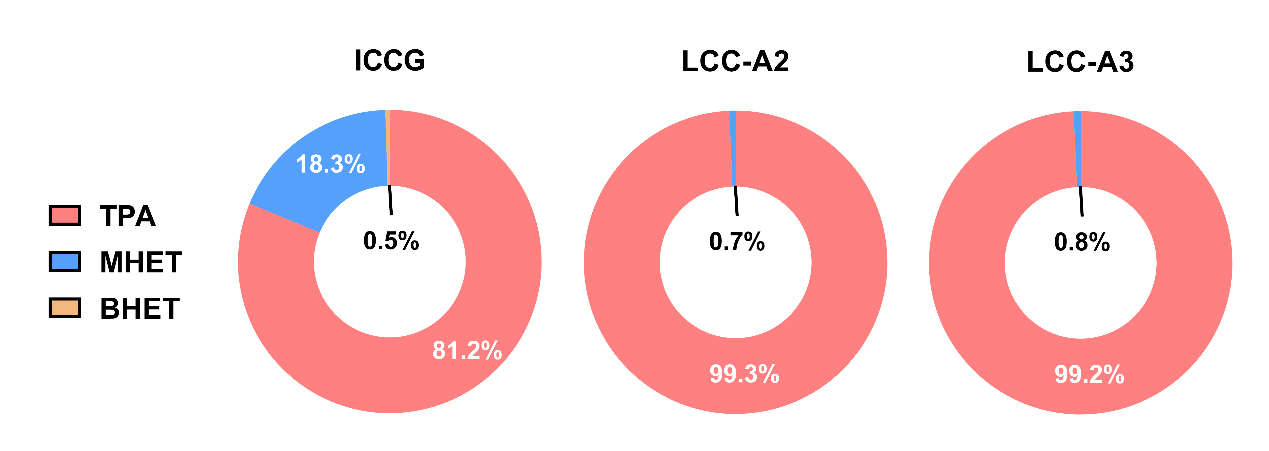


**Supplementary Figure 14. The composition of the hydrolysis products from the Pc-PET in 72 °C with LCC variants.** The composition of hydrolysis products after the depolymerization of Pc-PET for 6 h in the bioreactor was analyzed by HPLC. The proportions of the final product TPA in LCC-A2 and LCC-A3 were 99.3% and 99.2%, respectively, whereas the intermediate product MHET was only 0.7% and 0.8%, and no BHET was detected. In contrast, the proportion of MHET in ICCG was up to 18.3%, with an additional 0.5% of BHET.


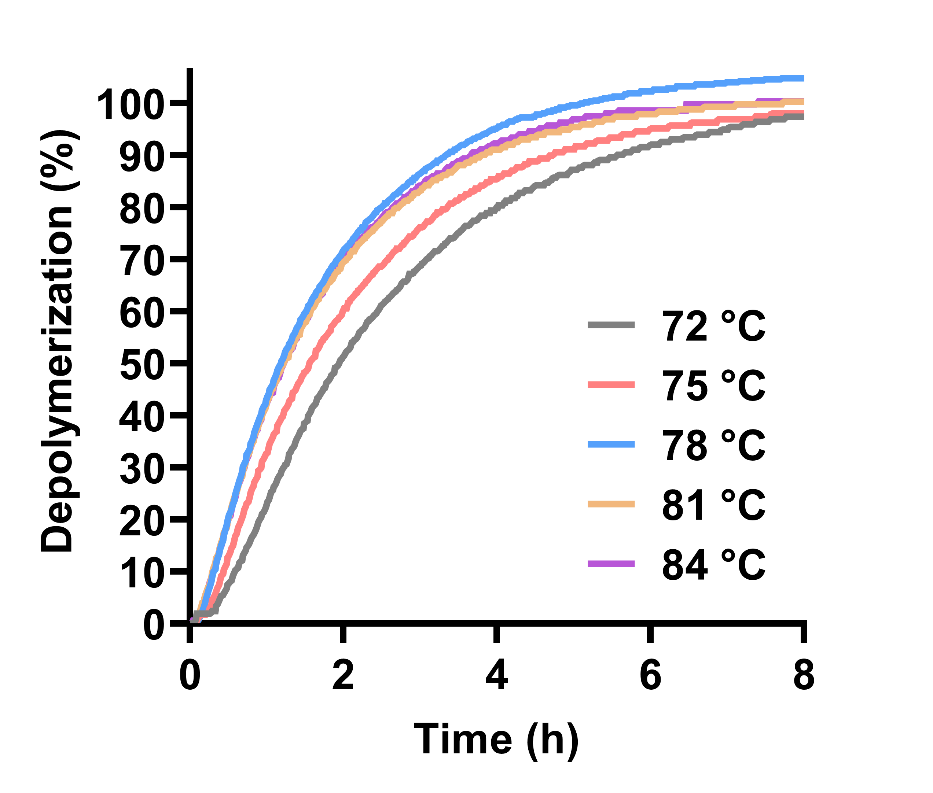


**Supplementary Figure 15. Bio-depolymerization of post-consumer PET bottles by LCC-A2 at different temperatures.** Comparison of the Pc-PET depolymerization kinetics of LCC-A2 using 200 g kg−1 pretreated Pc-PET and 0.6 g kg−1 enzyme. The degradation process was carried out in 0.1 M phosphate buffer (pH 8.5) at different temperatures. The pH was maintained by titrating aqueous NaOH to neutralize the acidic product TPA produced by the Pc-PET degradation. The percentage of Pc-PET depolymerization was calculated based on the consumption of NaOH.


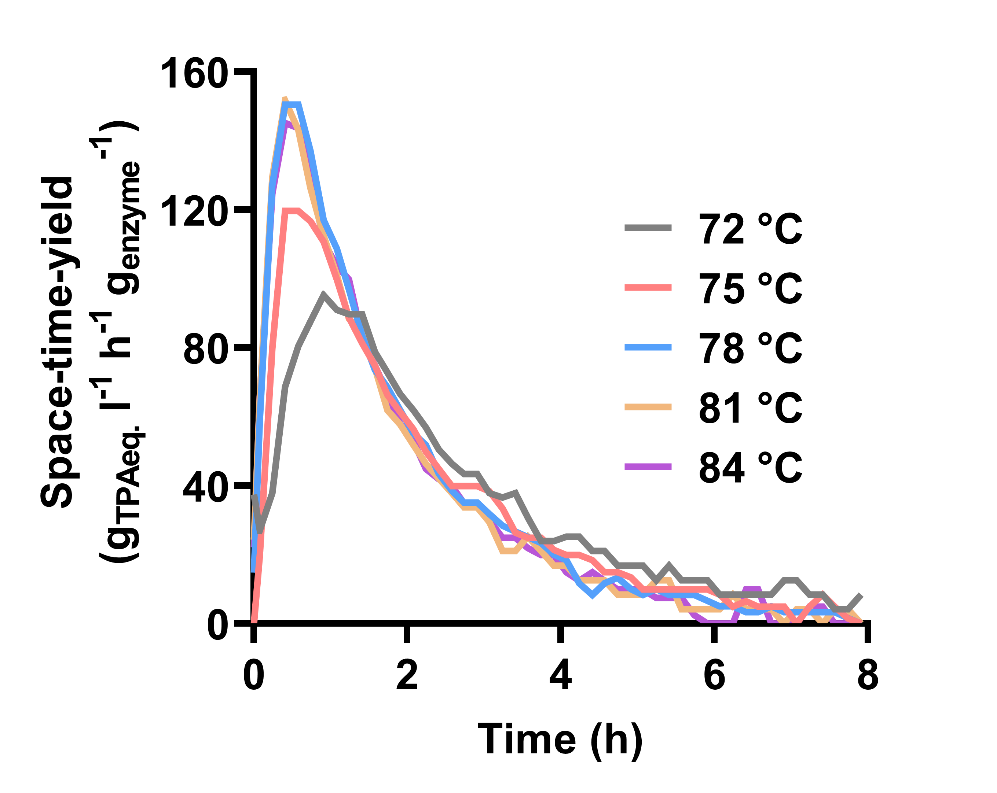


**Supplementary Figure 16. The specific space-time-yield product of LCC-A2 in different temperatures.** Comparison of the specific space-time-yield product from LCC-A2. The equivalent TPA quantity (TPAeq.) was converted from the consumption of NaOH.

## Supplementary Tables

**Supplementary Table 1. The duration ratio of amino acid residues in the dynamic conformations of the ICCG-3PET complex.**

| **Residue (Round1)** | **Duration ratio (%)** | **Residue (Round2)** | **Duration ratio (%)** | **Residue (Round3)** | **Duration ratio (%)** |
| --- | --- | --- | --- | --- | --- |
| 95 | 67% | 212 | 68% | 166 | 69% |
| 190 | 61% | 190 | 65% | 95 | 69% |
| 165 | 60% | 95 | 65% | 212 | 68% |
| 166 | 58% | 242 | 63% | 190 | 67% |
| 212 | 54% | 166 | 60% | 242 | 65% |
| 96 | 53% | 165 | 55% | 165 | 61% |
| 242 | 52% | 125 | 53% | 243 | 53% |
| 125 | 49% | 243 | 53% | 96 | 49% |
| 213 | 48% | 246 | 48% | 97 | 44% |
| 243 | 43% | 101 | 45% | 246 | 42% |
| 97 | 41% | 164 | 43% | 101 | 42% |
| 164 | 39% | 96 | 42% | 125 | 41% |
| 211 | 34% | 97 | 42% | 164 | 38% |
| 218 | 31% | 213 | 42% | 127 | 38% |
| 246 | 30% | 127 | 38% | 128 | 35% |
| 214 | 29% | 211 | 36% | 211 | 34% |
| 241 | 27% | 124 | 34% | 126 | 33% |
| 209 | 27% | 128 | 31% | 192 | 33% |
| 101 | 27% | 126 | 31% | 124 | 29% |
| 210 | 27% | 247 | 31% | 100 | 29% |
| 244 | 26% | 94 | 26% | 213 | 28% |
| 192 | 25% | 214 | 25% | 247 | 28% |
| 124 | 25% | 100 | 24% | 94 | 27% |
| 100 | 25% | 192 | 22% | 218 | 25% |
| 188 | 23% | 248 | 20% | 210 | 25% |
| 215 | 23% | 104 | 20% | 241 | 22% |
| 127 | 22% | 218 | 20% | 98 | 22% |
| 191 | 22% |  |  |  |  |
| 94 | 22% |  |  |  |  |
| 128 | 21% |  |  |  |  |
| 240 | 21% |  |  |  |  |
| 247 | 20% |  |  |  |  |
| 98 | 20% |  |  |  |  |

**Supplementary Table 2. The first round of variants predicted by ADD and their relative activity assessed by A240.**

| **Variant** | **Affinity energy** | **Relative activity** | **Variant** | **Affinity energy** | **Relative activity** |
| --- | --- | --- | --- | --- | --- |
| M166A | -7.08 | 0.014 | T96D | -6.12 | 0.027 |
| A97N | -6.66 | 0.000 | H218W | -6.02 | 1.058 |
| T211A | -6.54 | 1.008 | A97D | -5.92 | 1.081 |
| T211S | -6.46 | 0.889 | M166N | -5.92 | 0.001 |
| M166D | -6.38 | 0.000 | T211Q | -5.9 | 1.063 |
| M166H | -6.34 | 0.000 | T96Y | -5.9 | 0.450 |
| M166S | -6.28 | 0.001 | H218F | -5.86 | 1.096 |
| N246D | -6.26 | 0.038 | M166F | -5.84 | 0.000 |
| M166G | -6.24 | 0.001 | N246I | -5.82 | 0.493 |
| M166V | -6.22 | 0.001 | T211K | -5.82 | 1.032 |
| N246C | -6.2 | 0.850 | T96R | -5.78 | 0.037 |
| T211N | -6.2 | 1.102 | H218Y | -5.76 | 1.270 |
| M166P | -6.18 | 0.000 | M166C | -5.74 | 0.001 |
| M166T | -6.18 | 0.001 | N246T | -5.74 | 0.271 |
| A97K | -6.16 | 0.117 | T211F | -5.74 | 0.920 |
| A97G | -6.12 | 0.497 | A97I | -5.72 | 0.462 |
| H218L | -6.12 | 0.896 | ICCG | -5.32 | 1.000 |

**Supplementary Table 3. The second round of variants predicted by ADD and their relative activity assessed by A240.**

| **Variant** | **Affinity energy** | **Relative activity** | **Variant** | **Affinity energy** | **Relative activity** |
| --- | --- | --- | --- | --- | --- |
| H218Y/S247E | -6.78 | 1.811 | H218Y/N248V | -6.28 | 0.957 |
| H218Y/N248Q | -6.7 | 1.557 | H218Y/N246S | -6.26 | 0.847 |
| H218Y/P128L | -6.68 | 0.122 | H218Y/T211Y | -6.2 | 0.462 |
| H218Y/S100K | -6.68 | 1.053 | H218Y/T96S | -6.2 | 0.080 |
| H218Y/T96K | -6.6 | 0.001 | H218Y/T211M | -6.18 | 0.696 |
| H218Y/M166P | -6.56 | 0.135 | H218Y/N246E | -6.14 | 0.899 |
| H218Y/S100E | -6.52 | 0.545 | H218Y/N246V | -6.14 | 0.731 |
| H218Y/T188G | -6.5 | 0.106 | H218Y/D126S | -6.12 | 0.053 |
| H218Y/T192R | -6.5 | 0.211 | H218Y/P128N | -6.1 | 0.029 |
| H218Y/P128Q | -6.44 | 0.105 | H218Y/T96Y | -6.1 | 0.150 |
| H218Y/R124G | -6.44 | 0.000 | H218Y/A97I | -6.08 | 0.286 |
| H218Y/S101L | -6.44 | 0.897 | H218Y/A97P | -6.08 | 0.053 |
| H218Y/N246R | -6.42 | 0.373 | H218Y/N248D | -6.08 | 1.639 |
| H218Y/T96V | -6.38 | 0.161 | H218Y/M166N | -6.06 | 0.034 |
| H218Y/R124H | -6.36 | 0.481 | H218Y/Q217T | -6.04 | 0.028 |
| H218Y/S100I | -6.36 | 1.056 | H218Y/S247D | -6.04 | 0.884 |
| H218Y/F125H | -6.32 | 0.314 | H218Y/T96R | -6.04 | 0.054 |
| H218Y/M166L | -6.32 | 0.032 | H218Y/A97V | -6.02 | 0.267 |
| H218Y/A97K | -6.3 | 0.415 | H218Y/Q217K | -6.02 | 0.125 |
| H218Y/D126Y | -6.3 | 0.314 | H218Y/Q217W | -6.02 | 0.207 |
| H218Y/T192C | -6.3 | 0.341 | H218Y/H191S | -6 | 0.704 |
| H218Y/T211R | -6.3 | 0.592 | H218Y/S100W | -6 | 0.415 |

**Supplementary Table 4. The third round of variants predicted by ADD and their relative activity assessed by A240.**

| **Variant** | **Affinity energy** | **Relative activity** | **Variant** | **Affinity energy** | **Relative activity** |
| --- | --- | --- | --- | --- | --- |
| H218Y/N248D/P128C | -6.98 | 0.836 | H218Y/N248D/I243F | -6.02 | 1.339 |
| H218Y/N248D/S100H | -6.66 | 1.709 | H218Y/N248D/Q217E | -6.02 | 1.812 |
| H218Y/N248D/T96Q | -6.66 | 0.162 | H218Y/N248D/Q217I | -6.02 | 1.686 |
| H218Y/N248D/A97N | -6.58 | 0.440 | H218Y/N248D/S101H | -6.02 | 2.749 |
| H218Y/N248D/R124T | -6.58 | 0.259 | H218Y/N248D/S247W | -6.02 | 1.327 |
| H218Y/N248D/W104C | -6.58 | 1.555 | H218Y/N248D/A97P | -6 | 0.024 |
| H218Y/N248D/T96C | -6.46 | 0.127 | H218Y/N248D/D98Y | -6 | 0.395 |
| H218Y/N248D/Q217F | -6.42 | 1.471 | H218Y/N248D/H242I | -6 | 0.009 |
| H218Y/N248D/R124S | -6.34 | 0.291 | H218Y/N248D/I243V | -6 | 1.656 |
| H218Y/N248D/A213V | -6.32 | 0.096 | H218Y/N248D/Q217W | -6 | 1.162 |
| H218Y/N248D/D98E | -6.3 | 1.850 | H218Y/N248D/S100W | -6 | 0.736 |
| H218Y/N248D/S247A | -6.3 | 1.868 | H218Y/N248D/F125R | -5.98 | 0.157 |
| H218Y/N248D/A97W | -6.28 | 0.087 | H218Y/N248D/S241D | -5.98 | 0.450 |
| H218Y/N248D/I243Q | -6.28 | 2.214 | H218Y/N248D/V212N | -5.98 | 0.087 |
| H218Y/N248D/D98S | -6.24 | 0.939 | H218Y/N248D/A213T | -5.96 | 0.149 |
| H218Y/N248D/S100C | -6.22 | 0.674 | H218Y/N248D/D126S | -5.96 | 1.369 |
| H218Y/N248D/W104Y | -6.22 | 1.824 | H218Y/N248D/D98K | -5.96 | 0.320 |
| H218Y/N248D/S101W | -6.2 | 0.178 | H218Y/N248D/T188E | -5.96 | 0.449 |
| H218Y/N248D/S247R | -6.2 | 2.022 | H218Y/N248D/Y95W | -5.96 | 2.426 |
| H218Y/N248D/S247I | -6.18 | 0.605 | H218Y/N248D/D126C | -5.94 | 1.186 |
| H218Y/N248D/A97G | -6.16 | 0.791 | H218Y/N248D/D129L | -5.94 | 0.086 |
| H218Y/N248D/A97I | -6.16 | 0.181 | H218Y/N248D/D129T | -5.94 | 0.471 |
| H218Y/N248D/P128N | -6.16 | 0.037 | H218Y/N248D/H191R | -5.94 | 0.041 |
| H218Y/N248D/H242D | -6.14 | 0.009 | H218Y/N248D/I243P | -5.94 | 1.436 |
| H218Y/N248D/H164I | -6.12 | 0.096 | H218Y/N248D/I243S | -5.94 | 2.495 |
| H218Y/N248D/N246Y | -6.12 | 1.121 | H218Y/N248D/Q217T | -5.94 | 1.665 |
| H218Y/N248D/Q217D | -6.1 | 1.553 | H218Y/N248D/Q217V | -5.94 | 1.691 |
| H218Y/N248D/W190P | -6.1 | 0.003 | H218Y/N248D/R124Q | -5.94 | 0.189 |
| H218Y/N248D/H164F | -6.08 | 0.213 | H218Y/N248D/S241R | -5.94 | 1.714 |
| H218Y/N248D/Q217G | -6.08 | 2.000 | H218Y/N248D/T96Y | -5.94 | 0.099 |
| H218Y/N248D/S241A | -6.08 | 1.672 | H218Y/N248D/W104V | -5.94 | 1.795 |

**Supplementary Table 5. Inverse Michaelis-Menten analytics of variants of LCC.**

| **Enzyme** | ***k*cat (inv*V*max/S*0) (nmol g-1 s-1)** | **inv*K*m (µM)** | ***k*cat/inv*K*m (s-1 g-1 ml)** | **R2** |
| --- | --- | --- | --- | --- |
| ICCG | 426.3±18.1 | 3.44±0.34 | 123.9 | 0.99 |
| LCC-A2 | 539.9±35.6 | 1.61±0.31 | 334.7 | 0.97 |
| LCC-A3 | 525.7±29.3 | 1.52±0.25 | 346.5 | 0.98 |

**Supplementary Table 6. Cluster results of interaction energy analysis for each residue in ICCG with 3PET.**

| **Cluster Number** | **Residues Number** |
| --- | --- |
| 1 | Resid94 Resid100 Resid126 Resid127 Resid128 Resid165 Resid192 Resid248 |
| 2 | Resid129 Resid193 |
| 3 | Resid96 Resid97 Resid166 Resid190 Resid211 Resid212 Resid247 |
| 4 | Resid125 |
| 5 | Resid36 Resid37 Resid38 Resid39 Resid40 Resid41 Resid42 Resid43 Resid44 Resid45 Resid46 Resid47 Resid48 Resid49 Resid50 Resid51 Resid52 Resid53 Resid54 Resid55 Resid56 Resid57 Resid58 Resid59 Resid60 Resid61 Resid62 Resid63 Resid64 Resid65 Resid66 Resid67 Resid68 Resid69 Resid70 Resid71 Resid72 Resid73 Resid74 Resid75 Resid76 Resid77 Resid78 Resid79 Resid80 Resid81 Resid82 Resid83 Resid84 Resid85 Resid86 Resid87 Resid88 Resid89 Resid90 Resid91 Resid92 Resid93 Resid99 Resid105 Resid106 Resid107 Resid108 Resid109 Resid110 Resid111 Resid112 Resid113 Resid114 Resid115 Resid116 Resid117 Resid118 Resid119 Resid120 Resid121 Resid122 Resid123 Resid130 Resid131 Resid132 Resid133 Resid134 Resid135 Resid136 Resid137 Resid138 Resid139 Resid140 Resid141 Resid142 Resid143 Resid144 Resid145 Resid146 Resid147 Resid148 Resid149 Resid150 Resid151 Resid152 Resid153 Resid154 Resid155 Resid156 Resid157 Resid158 Resid159 Resid160 Resid161 Resid162 Resid163 Resid167 Resid168 Resid169 Resid170 Resid171 Resid172 Resid173 Resid174 Resid175 Resid176 Resid177 Resid178 Resid179 Resid180 Resid181 Resid182 Resid183 Resid184 Resid185 Resid186 Resid187 Resid188 Resid189 Resid191 Resid194 Resid195 Resid196 Resid197 Resid198 Resid199 Resid200 Resid201 Resid202 Resid203 Resid204 Resid205 Resid206 Resid207 Resid208 Resid209 Resid213 Resid214 Resid215 Resid216 Resid217 Resid218 Resid219 Resid220 Resid221 Resid222 Resid223 Resid224 Resid225 Resid226 Resid227 Resid228 Resid229 Resid230 Resid231 Resid232 Resid233 Resid234 Resid235 Resid236 Resid237 Resid238 Resid239 Resid240 Resid241 Resid244 Resid245 Resid249 Resid250 Resid251 Resid252 Resid253 Resid254 Resid255 Resid256 Resid257 Resid258 Resid259 Resid260 Resid261 Resid262 Resid263 Resid264 Resid265 Resid266 Resid267 Resid268 Resid269 Resid270 Resid271 Resid272 Resid273 Resid274 Resid275 Resid276 Resid277 Resid278 Resid279 Resid280 Resid281 Resid282 Resid283 Resid284 Resid285 Resid286 Resid287 Resid288 Resid289 Resid290 Resid291 Resid292 Resid293 |
| 6 | Resid124 |
| 7 | Resid102 Resid103 Resid104 Resid164 |
| 8 | Resid95 Resid101 Resid242 Resid243 Resid246 |
| 9 | Resid210 |
| 10 | Resid98 |

**Supplementary Table 7. Cluster results of interaction energy analysis for each residue in LCC-A2 with 3PET.**

| **Cluster Number** | **Residues Number** |
| --- | --- |
| 1 | Resid96 Resid101 Resid125 Resid166 Resid243 Resid246 |
| 2 | Resid210 |
| 3 | Resid248 |
| 4 | Resid190 Resid212 Resid242 |
| 5 | Resid94 Resid98 Resid104 Resid128 Resid131 Resid191 Resid241 Resid247 |
| 6 | Resid36 Resid37 Resid38 Resid39 Resid40 Resid41 Resid42 Resid43 Resid44 Resid45 Resid46 Resid47 Resid48 Resid49 Resid50 Resid51 Resid52 Resid53 Resid54 Resid55 Resid56 Resid57 Resid58 Resid59 Resid60 Resid61 Resid62 Resid63 Resid64 Resid65 Resid66 Resid67 Resid68 Resid69 Resid70 Resid71 Resid72 Resid73 Resid74 Resid75 Resid76 Resid77 Resid78 Resid79 Resid80 Resid81 Resid82 Resid83 Resid84 Resid85 Resid86 Resid87 Resid88 Resid89 Resid90 Resid91 Resid92 Resid93 Resid99 Resid102 Resid103 Resid105 Resid106 Resid107 Resid108 Resid109 Resid110 Resid111 Resid112 Resid113 Resid114 Resid115 Resid116 Resid117 Resid118 Resid119 Resid120 Resid121 Resid122 Resid123 Resid124 Resid130 Resid132 Resid133 Resid134 Resid135 Resid136 Resid137 Resid138 Resid139 Resid140 Resid141 Resid142 Resid143 Resid144 Resid145 Resid146 Resid147 Resid148 Resid149 Resid150 Resid151 Resid152 Resid153 Resid154 Resid155 Resid156 Resid157 Resid158 Resid159 Resid160 Resid161 Resid162 Resid163 Resid167 Resid168 Resid169 Resid170 Resid171 Resid172 Resid173 Resid174 Resid175 Resid176 Resid177 Resid178 Resid179 Resid180 Resid181 Resid182 Resid183 Resid184 Resid185 Resid186 Resid187 Resid188 Resid189 Resid195 Resid196 Resid197 Resid198 Resid199 Resid200 Resid201 Resid202 Resid203 Resid204 Resid205 Resid206 Resid207 Resid208 Resid209 Resid213 Resid214 Resid215 Resid216 Resid219 Resid220 Resid221 Resid222 Resid223 Resid224 Resid225 Resid226 Resid227 Resid228 Resid229 Resid230 Resid231 Resid232 Resid233 Resid234 Resid235 Resid236 Resid237 Resid238 Resid239 Resid240 Resid244 Resid245 Resid249 Resid250 Resid251 Resid252 Resid253 Resid254 Resid255 Resid256 Resid257 Resid258 Resid259 Resid260 Resid261 Resid262 Resid263 Resid264 Resid265 Resid266 Resid267 Resid268 Resid269 Resid270 Resid271 Resid272 Resid273 Resid274 Resid275 Resid276 Resid277 Resid278 Resid279 Resid280 Resid281 Resid282 Resid283 Resid284 Resid285 Resid286 Resid287 Resid288 Resid289 Resid290 Resid291 Resid292 Resid293 |
| 7 | Resid95 |
| 8 | Resid192 Resid194 Resid217 Resid218 |
| 9 | Resid129 Resid164 Resid193 |
| 10 | Resid97 Resid100 Resid126 Resid127 Resid165 Resid211 |

**Supplementary Table 8. Cluster results of interaction energy analysis for each residue in LCC-A3 with 3PET.**

| **Cluster Number** | **Residues Number** |
| --- | --- |
| 1 | Resid94 Resid125 Resid210 Resid213 |
| 2 | Resid36 Resid37 Resid38 Resid39 Resid40 Resid41 Resid42 Resid43 Resid44 Resid45 Resid46 Resid47 Resid48 Resid49 Resid50 Resid51 Resid52 Resid54 Resid55 Resid56 Resid57 Resid58 Resid59 Resid60 Resid61 Resid62 Resid63 Resid64 Resid65 Resid66 Resid67 Resid68 Resid69 Resid70 Resid71 Resid72 Resid73 Resid74 Resid75 Resid76 Resid77 Resid78 Resid79 Resid80 Resid81 Resid82 Resid83 Resid84 Resid85 Resid86 Resid87 Resid88 Resid89 Resid90 Resid91 Resid92 Resid93 Resid99 Resid102 Resid103 Resid106 Resid107 Resid109 Resid110 Resid111 Resid112 Resid113 Resid114 Resid115 Resid116 Resid117 Resid118 Resid119 Resid120 Resid121 Resid122 Resid123 Resid130 Resid132 Resid133 Resid134 Resid135 Resid136 Resid137 Resid138 Resid139 Resid140 Resid141 Resid142 Resid143 Resid144 Resid145 Resid146 Resid147 Resid148 Resid149 Resid150 Resid151 Resid152 Resid153 Resid154 Resid155 Resid156 Resid157 Resid158 Resid159 Resid160 Resid161 Resid162 Resid163 Resid167 Resid168 Resid169 Resid170 Resid171 Resid172 Resid173 Resid174 Resid175 Resid176 Resid177 Resid178 Resid179 Resid180 Resid181 Resid182 Resid183 Resid184 Resid185 Resid186 Resid187 Resid188 Resid189 Resid193 Resid194 Resid195 Resid196 Resid197 Resid198 Resid199 Resid200 Resid201 Resid202 Resid203 Resid204 Resid205 Resid206 Resid207 Resid208 Resid209 Resid215 Resid216 Resid217 Resid218 Resid219 Resid220 Resid221 Resid222 Resid223 Resid224 Resid225 Resid226 Resid227 Resid228 Resid229 Resid230 Resid231 Resid232 Resid233 Resid234 Resid235 Resid236 Resid237 Resid238 Resid239 Resid240 Resid241 Resid251 Resid252 Resid253 Resid254 Resid255 Resid256 Resid257 Resid258 Resid259 Resid260 Resid261 Resid262 Resid263 Resid264 Resid265 Resid266 Resid267 Resid268 Resid269 Resid270 Resid271 Resid272 Resid273 Resid274 Resid275 Resid276 Resid277 Resid278 Resid279 Resid280 Resid281 Resid282 Resid283 Resid284 Resid285 Resid286 Resid287 Resid288 Resid289 Resid290 Resid291 Resid292 Resid293 |
| 3 | Resid97 Resid104 Resid164 Resid247 Resid248 |
| 4 | Resid53 Resid98 |
| 5 | Resid129 |
| 6 | Resid95 |
| 7 | Resid96 Resid101 Resid165 Resid166 Resid212 |
| 8 | Resid100 Resid105 Resid124 Resid126 Resid127 Resid128 Resid131 Resid191 Resid192 Resid211 Resid214 Resid244 Resid245 Resid249 Resid250 |
| 9 | Resid108 |
| 10 | Resid190 Resid242 Resid243 Resid246 |

**Supplementary Table 9. Cluster results of changes in PET-binding capacity of key amino acids in the PET binding region of variants compared to ICCG.**

| **Cluster Number** | **Residues Number** |
| --- | --- |
| 1 | Resid102 Resid98 Resid103 Resid77 |
| 2 | Resid95 Resid165 |
| 3 | Resid213 Resid97 Resid246 Resid243 Resid127 Resid94 Resid128 Resid248 |
| 4 | Resid248 Resid126 Resid211 Resid124 Resid214 |
| 5 | Resid247 Resid210 |
| 6 | Resid96 Resid192 Resid218 Resid166 Resid164 Resid100 |
| 7 | Resid247 Resid249 Resid215 Resid129 Resid245 Resid104 Resid191 Resid250 Resid253 Resid105 |
| 8 | Resid222 Resid239 Resid51 Resid188 Resid122 Resid193 Resid58 Resid194 Resid93 Resid209 Resid252 Resid241 Resid123 Resid244 Resid173 Resid216 Resid107 Resid217 |
| 9 | Resid125 Resid212 Resid242 Resid190 |
| 10 | Resid99 Resid101 Resid108 |

**Supplementary Table 10. Nucleotide and amino acid sequence of ICCG1, LCC-A2, LCC-A3 and Fast-PETase2.** The mutations of LCC-A2 and LCC-A3 are colored red and in bold.

| **Enzyme** | **Nucleotide sequence** |
| --- | --- |
| ICCG | ATGAGCAACCCGTACCAGCGTGGCCCGAATCCGACCCGCAGCGCACTGACCGCAGATGGCCCGTTTAGCGTGGCAACCTACACCGTCTCACGCCTGTCAGTCTCGGGTTTTGGCGGTGGCGTGATTTATTACCCGACCGGCACGTCTCTGACGTTCGGTGGCATCGCGATGAGTCCGGGTTATACCGCAGATGCTAGCTCTCTGGCATGGCTGGGTCGTCGCCTGGCTTCCCATGGCTTTGTGGTTCTGGTGATTAACACGAATTCACGTTTCGATGGTCCGGACAGCCGCGCCTCTCAGCTGAGTGCCGCCCTGAACTACCTGCGTACCAGTTCCCCGAGCGCCGTTCGCGCACGTCTGGATGCAAATCGTCTGGCGGTTGCCGGTCATTCTATGGGTGGCGGTGGCACCCTGCGTATTGCAGAACAAAACCCGAGCCTGAAAGCGGCTGTCCCGCTGACCCCGTGGCACACCGATAAAACGTTTAATACCAGTGTCCCGGTGCTGATTGTTGGCGCAGAAGCTGACACCGTGGCGCCGGTTTCGCAGCATGCCATCCCGTTTTATCAAAACCTGCCGAGCACCACGCCGAAAGTTTACGTCGAACTGTGCAACGCATCGCACATTGCTCCGAATAGCAACAATGCGGCCATTTCCGTTTATACGATCTCATGGATGAAACTGTGGGTCGATAATGACACCCGTTACCGCCAGTTCCTGTGTAATGTGAACGACCCGGCTCTGTGCGACTTCCGCACCAATAATCGCCACTGCCAACTCGAGCACCACCACCACCACCAC |
| LCC-A2 | ATGAGCAACCCGTACCAGCGTGGCCCGAATCCGACCCGCAGCGCACTGACCGCAGATGGCCCGTTTAGCGTGGCAACCTACACCGTCTCACGCCTGTCAGTCTCGGGTTTTGGCGGTGGCGTGATTTATTACCCGACCGGCACGTCTCTGACGTTCGGTGGCATCGCGATGAGTCCGGGTTATACCGCAGATGCTAGCTCTCTGGCATGGCTGGGTCGTCGCCTGGCTTCCCATGGCTTTGTGGTTCTGGTGATTAACACGAATTCACGTTTCGATGGTCCGGACAGCCGCGCCTCTCAGCTGAGTGCCGCCCTGAACTACCTGCGTACCAGTTCCCCGAGCGCCGTTCGCGCACGTCTGGATGCAAATCGTCTGGCGGTTGCCGGTCATTCTATGGGTGGCGGTGGCACCCTGCGTATTGCAGAACAAAACCCGAGCCTGAAAGCGGCTGTCCCGCTGACCCCGTGGCACACCGATAAAACGTTTAATACCAGTGTCCCGGTGCTGATTGTTGGCGCAGAAGCTGACACCGTGGCGCCGGTTTCGCAG**TAT**GCCATCCCGTTTTATCAAAACCTGCCGAGCACCACGCCGAAAGTTTACGTCGAACTGTGCAACGCATCGCACATTGCTCCGAATAGC**GAT**AATGCGGCCATTTCCGTTTATACGATCTCATGGATGAAACTGTGGGTCGATAATGACACCCGTTACCGCCAGTTCCTGTGTAATGTGAACGACCCGGCTCTGTGCGACTTCCGCACCAATAATCGCCACTGCCAACTCGAGCACCACCACCACCACCAC |
| LCC-A3 | ATGAGCAACCCGTACCAGCGTGGCCCGAATCCGACCCGCAGCGCACTGACCGCAGATGGCCCGTTTAGCGTGGCAACCTACACCGTCTCACGCCTGTCAGTCTCGGGTTTTGGCGGTGGCGTGATTTATTACCCGACCGGCACGTCTCTGACGTTCGGTGGCATCGCGATGAGTCCGGGTTATACCGCAGATGCTAGCTCTCTGGCATGGCTGGGTCGTCGCCTGGCTTCCCATGGCTTTGTGGTTCTGGTGATTAACACGAATTCACGTTTCGATGGTCCGGACAGCCGCGCCTCTCAGCTGAGTGCCGCCCTGAACTACCTGCGTACCAGTTCCCCGAGCGCCGTTCGCGCACGTCTGGATGCAAATCGTCTGGCGGTTGCCGGTCATTCTATGGGTGGCGGTGGCACCCTGCGTATTGCAGAACAAAACCCGAGCCTGAAAGCGGCTGTCCCGCTGACCCCGTGGCACACCGATAAAACGTTTAATACCAGTGTCCCGGTGCTGATTGTTGGCGCAGAAGCTGACACCGTGGCGCCGGTTTCGCAG**TAT**GCCATCCCGTTTTATCAAAACCTGCCGAGCACCACGCCGAAAGTTTACGTCGAACTGTGCAACGCATCGCACATTGCTCCGAAT**GCAGAT**AATGCGGCCATTTCCGTTTATACGATCTCATGGATGAAACTGTGGGTCGATAATGACACCCGTTACCGCCAGTTCCTGTGTAATGTGAACGACCCGGCTCTGTGCGACTTCCGCACCAATAATCGCCACTGCCAACTCGAGCACCACCACCACCACCAC |
| Fast-PETase | ATGAACTTCCCGCGTGCAAGCCGTCTGATGCAGGCCGCCGTTCTGGGTGGCCTGATGGCCGTGAGCGCCGCAGCAACCGCCCAGACAAATCCGTATGCCCGTGGCCCGAATCCGACCGCCGCATCACTGGAAGCAAGCGCCGGTCCGTTTACCGTGCGTAGTTTTACCGTGAGTCGTCCGAGTGGCTATGGTGCAGGCACCGTGTATTATCCGACCAATGCCGGTGGTACCGTGGGTGCAATTGCAATTGTTCCGGGTTATACCGCACGTCAGAGCAGTATTAAGTGGTGGGGCCCGCGCCTGGCAAGTCATGGTTTTGTTGTGATTACCATTGATACCAATAGTACCCTGGATCAGCCGGAAAGTCGTAGCAGTCAGCAGATGGCCGCACTGCGCCAGGTGGCAAGTCTGAATGGTACCAGCAGCAGTCCGATCTATGGTAAAGTTGATACCGCACGTATGGGCGTTATGGGTTGGAGTATGGGTGGCGGTGGCAGCCTGATTAGCGCAGCCAATAATCCGAGCCTGAAAGCAGCAGCACCGCAGGCACCGTGGCATAGTAGCACCAATTTTAGCAGTGTTACCGTGCCGACCCTGATTTTTGCATGCGAAAATGATAGTATTGCCCCGGTTAATAGCAGTGCACTGCCGATCTATGATAGCATGAGCCAGAATGCCAAACAGTTTCTGGAAATTAAGGGTGGCAGTCATAGTTGCGCCAATAGCGGTAATAGCAATCAGGCACTGATTGGTAAAAAAGGTGTGGCCTGGATGAAACGTTTTATGGATAATGATACCCGTTATAGCACCTTTGCCTGTGAAAATCCGAATAGCACCGCCGTGAGTGATTTTCGTACCGCAAATTGCAGCCTCGAGCACCACCACCACCACCAC |
| **Enzyme** | **Expressed amino acid sequence** |
| ICCG | M35SNPYQRGPNPTRSALTADGPFSVATYTVSRLSVSGFGGGVIYYPTGTSLTFGGIAMSPGYTADASSLAWLGRRLASHGFVVLVINTNSRFDGPDSRASQLSAALNYLRTSSPSAVRARLDANRLAVAGHSMGGGGTLRIAEQNPSLKAAVPLTPWHTDKTFNTSVPVLIVGAEADTVAPVSQHAIPFYQNLPSTTPKVYVELCNASHIAPNSNNAAISVYTISWMKLWVDNDTRYRQFLCNVNDPALCDFRTNNRHCQLEHHHHHH |
| LCC-A2 | M35SNPYQRGPNPTRSALTADGPFSVATYTVSRLSVSGFGGGVIYYPTGTSLTFGGIAMSPGYTADASSLAWLGRRLASHGFVVLVINTNSRFDGPDSRASQLSAALNYLRTSSPSAVRARLDANRLAVAGHSMGGGGTLRIAEQNPSLKAAVPLTPWHTDKTFNTSVPVLIVGAEADTVAPVSQ**Y**AIPFYQNLPSTTPKVYVELCNASHIAPNS**D**NAAISVYTISWMKLWVDNDTRYRQFLCNVNDPALCDFRTNNRHCQLEHHHHHH |
| LCC-A3 | M35SNPYQRGPNPTRSALTADGPFSVATYTVSRLSVSGFGGGVIYYPTGTSLTFGGIAMSPGYTADASSLAWLGRRLASHGFVVLVINTNSRFDGPDSRASQLSAALNYLRTSSPSAVRARLDANRLAVAGHSMGGGGTLRIAEQNPSLKAAVPLTPWHTDKTFNTSVPVLIVGAEADTVAPVSQ**Y**AIPFYQNLPSTTPKVYVELCNASHIAPN**AD**NAAISVYTISWMKLWVDNDTRYRQFLCNVNDPALCDFRTNNRHCQLEHHHHHH |
| Fast-PETase | MNFPRASRLMQAAVLGGLMAVSAAATAQTNPYARGPNPTAASLEASAGPFTVRSFTVSRPSGYGAGTVYYPTNAGGTVGAIAIVPGYTARQSSIKWWGPRLASHGFVVITIDTNSTLDQPESRSSQQMAALRQVASLNGTSSSPIYGKVDTARMGVMGWSMGGGGSLISAANNPSLKAAAPQAPWHSSTNFSSVTVPTLIFACENDSIAPVNSSALPIYDSMSQNAKQFLEIKGGSHSCANSGNSNQALIGKKGVAWMKRFMDNDTRYSTFACENPNSTAVSDFRTANCSLEHHHHHH |

## Supplementary References

1 Tournier, V. *et al.* An engineered PET depolymerase to break down and recycle plastic bottles. *Nature* **580**, 216-219 (2020).

2 Lu, H. *et al.* Machine learning-aided engineering of hydrolases for PET depolymerization. *Nature* **604**, 662-667 (2022).
